# Supplementary material
Source: HighWire-hosted journal article supplement (https://bmjopen.bmj.com/content/8/12/e020854)
Supplement: inline-supplementary-material-1 [file inline-supplementary-material-1.pdf]

## **A scoping review of the policy environment impacting alcohol related societal harm in India**

**List of authors:** Jaclyn Schess, Abhijeet Jambhale, Urvita Bhatia, Richard Velleman, Abhijit Nadkarni

**Table 1: Inclusion and exclusion criteria for initial search**

|                   | <b>Included</b>                      | <b>Excluded</b> |
|-------------------|--------------------------------------|-----------------|
| <b>Year</b>       | Any                                  |                 |
| <b>Language</b>   | English                              |                 |
| <b>Population</b> | Any                                  |                 |
| <b>Setting</b>    | India and any states or UTs of India |                 |

### **Databases:**

- 1) Medline
- 2) EMBASE
- 3) PsycINFO
- 4) Global Health

**Table 2: Search concepts**

| <b>Alcohol</b>       | <b>Policy and alcohol related policy terms</b> | <b>India</b>             |
|----------------------|------------------------------------------------|--------------------------|
| Alcohol              | Policy                                         | India                    |
| Substance            | Scheme                                         | Individual Indian states |
| Addiction            | De-addiction                                   |                          |
| Drinking             | Treatment                                      |                          |
| Alcoholism           | Plan                                           |                          |
| Alcohol use disorder | Marketing                                      |                          |
| Drink driving        | Liberalization                                 |                          |
| Liquor               | Lobbying                                       |                          |

|                       |                    |  |
|-----------------------|--------------------|--|
| Blood Alcohol Content | Demand             |  |
| Beverage              | Prevention         |  |
| Bar/Pub               | Promotion          |  |
| Unhealthy commodity   | Point of sale      |  |
|                       | Supply             |  |
|                       | Government         |  |
|                       | Ministry           |  |
|                       | Detoxification     |  |
|                       | Prohibition        |  |
|                       | Tax                |  |
|                       | Management         |  |
|                       | Regulation         |  |
|                       | Act                |  |
|                       | Program            |  |
|                       | Law                |  |
|                       | Legal              |  |
|                       | Legal drinking age |  |
|                       | Dry Day            |  |
|                       | Constitution       |  |
|                       | Permit             |  |
|                       | Excise             |  |
|                       | Rules              |  |
|                       | Amendment          |  |
|                       | Bill               |  |
|                       | License            |  |
|                       | Section            |  |
|                       | Legislation        |  |
|                       | Advertising        |  |
|                       | Enforcement        |  |

|  |                |  |
|--|----------------|--|
|  | Restriction    |  |
|  | Trade          |  |
|  | Importation    |  |
|  | Illicit        |  |
|  | Synthetic      |  |
|  | Pricing        |  |
|  | Limits         |  |
|  | Open Container |  |
|  | Revenue        |  |
|  | Industry       |  |
|  | Agreement      |  |
|  | Control        |  |
|  | Treaty         |  |
|  | Labeling       |  |
|  | Reduction      |  |
|  | Packaging      |  |
|  | Distribution   |  |

## **Data collection and analysis**

### **Selection of studies and guidelines**

Two reviewers will independently inspect the abstracts of the studies identified through the academic search strategy described below: two lists will then be composed of potentially eligible studies. The two reviewers will then discuss their selections and in the case of any disagreement regarding inclusion, a third reviewer will be consulted for a final decision.

### **Data extraction**

Following Preferred Reporting Items for Systematic Reviews and Meta-Analyses (PRISMA) guidelines, a record will be made of the number of papers retrieved, the number of papers excluded and the reasons for their exclusion. A formal data

extraction form will be designed for the papers to extract data relevant to the study aims. Two reviewers will independently perform data collection and any disagreements will be discussed and resolved.

**Medline Search Strategy:**

1. Alcohol\*.tw
2. Addict\*.tw
3. (Drink\* NOT water).tw \*\*
4. Substance use\*.tw
5. Substance abuse\*.tw
6. Alcohol addict\*.tw
7. Alcohol abuse\*.tw
8. Alcohol dependen\*.tw
9. "Alcohol use disorder".tw
10. Harmful drink\*.tw
11. Hazardous drink\*.tw
12. Social drink\*.tw
13. Dr?nk ADJ2 driv\*.tw
14. Liquor\*.tw
15. Liqueur\*.tw
16. Spirit\*.tw
17. "Blood alcohol content".tw
18. BAC.tw
19. Beverage\*.tw
20. Alcohol consum\*.tw
21. "Problematic alcohol use".tw
22. Whiskey\*.tw
23. Rum.tw
24. Beer\*.tw
25. Wine\*.tw
26. Vodka\*.tw

27. Unhealthy commodit\*.tw

28. Bars.tw

29. Pubs.tw

30. "Illicit alcohol".tw

31. "synthetic alcohol".tw

**32. OR (1-31)**

33. Alcohol/

34. Addict/

35. Drinker/

36. Alcohol addict/

37. Alcohol abuse/

38. Alcohol dependence/

39. "Alcohol use disorder"/

40. Harmful drinking/

41. Hazardous drinking/

42. Drink driving/

43. Drunk driving/

44. Liquor/

45. Spirit/

46. "Blood alcohol content"/

47. Beverage/

48. Whiskey/

49. Rum/

50. Beer/

51. Wine/

52. Vodka/

**53. OR (33-52)**

**54. 32 or 53**

55. Polic\*.tw

56. Scheme\*.tw

57. De?addiction.tw

58. Plan\*.tw
59. Government ADJ3 Polic\*.tw
60. Government ADJ3 Scheme\*.tw
61. Government ADJ3 Plan\*.tw
62. Market\*.tw
63. Liberaliz\*.tw
64. Neoliberalism.tw
65. Lobby\*.tw
66. Demand\*.tw
67. Prevent\*.tw
68. Promot\*.tw
69. Suppl\*.tw
70. Government\*.tw
71. Ministr\*.tw
72. Program\*.tw
73. Tax\*.tw
74. Detoxification.tw
75. Prohibit\*.tw
76. Manag\*.tw
77. Avail\*.tw
78. Access\*.tw
79. Regulat\*.tw
80. Act.tw
81. Acts.tw
82. Law\*.tw
83. Legal\*.tw
84. Drinking age.tw
85. Legal drinking age.tw
86. Minimum drinking age.tw
87. Underage drink\*.tw
88. Constitution\*.tw

- 89. Dry day\*.tw
- 90. Licens\*.tw
- 91. On-licens\*.tw
- 92. Off-licens\*.tw
- 93. Sale licens\*.tw
- 94. Resale.tw
- 95. Wholesale\*.tw
- 96. Retail\*.tw
- 97. Sale\*.tw
- 98. Sales outlet\*.tw
- 99. Excise.tw
- 100. Rule\*.tw
- 101. Amend\*.tw
- 102. Bill\*.tw
- 103. Permit\*.tw
- 104. Manufactur\* permit\*.tw
- 105. Section\*.tw
- 106. Legislat\*.tw
- 107. Advertis\*.tw
- 108. Advertising restrict\*.tw
- 109. Surrogate advertis\*.tw
- 110. Media restrict\*.tw
- 111. Billboard\*.tw
- 112. Sponsorship\*.tw
- 113. Partnership\*.tw
- 114. Enforc\*.tw
- 115. Public place\*.tw
- 116. Quantity restrict\*.tw
- 117. Restrict\*.tw
- 118. Time restrict\*.tw
- 119. Age restrict\*.tw

- 120. Location restrict\*.tw
- 121. Sale restrict\*.tw
- 122. Point of sale.tw
- 123. Trade.tw
- 124. Trade agreement\*.tw
- 125. Treaty.tw or treaties.tw or treatise.tw
- 126. Free trade.tw
- 127. "World Trade Organization".tw
- 128. "International Monetary Fund".tw
- 129. Import\*.tw
- 130. Export\*.tw
- 131. Tarriif\*.tw
- 132. Price\*.tw
- 133. Price setting.tw
- 134. Subsid\*.tw
- 135. Limit\*.tw
- 136. Open container\*.tw
- 137. Revenue\*.tw
- 138. Industr\*.tw
- 139. Agreement\*.tw
- 140. Control\*.tw
- 141. Packag\*.tw
- 142. Label\*.tw
- 143. Reduc\*.tw
- 144. Distribut\*.tw
- 145. OR (55-144)**
- 146. Policy/
- 147. Scheme/
- 148. Plan/
- 149. Marketing/
- 150. Liberalization/



- 151. Lobbying/
- 152. Demand/
- 153. Prevention/
- 154. Promotion/
- 155. Supply/
- 156. Government/
- 157. Program/
- 158. Taxes/
- 159. Detoxification/
- 160. Prohibition/
- 161. Management/
- 162. Regulation/
- 163. Act/
- 164. Law/
- 165. Legal/
- 166. Drinking age/
- 167. Legal drinking age/
- 168. Constitution/
- 169. License/
- 170. Rule/
- 171. Amendment/
- 172. Bill/
- 173. Permit/
- 174. Section/
- 175. Legislation/
- 176. Advertisement/
- 177. Billboard/
- 178. Sponsorship/
- 179. Partnership/
- 180. Enforcement/
- 181. Restriction/

- 182. Age restriction/
- 183. Trade/
- 184. Trade agreement/
- 185. Free trade/
- 186. Treaty/
- 187. "World Trade Organization"/
- 188. "International Monetary Fund"/
- 189. Import/
- 190. Export/
- 191. Tariff/
- 192. Subsidy/
- 193. Revenue/
- 194. Industry/
- 195. Agreement/
- 196. Control/
- 197. Packaging/
- 198. Labeling/
- 199. Reduction/
- 200. Distribution/
- 201. OR (146-200)**
- 202. 145 or 201**
- 203. 54 AND 202**
- 204. India\* not American.tw
- 205. "Indian union".tw
- 206. OR (204-205)**
- 207. Andaman and Nicobar Island\*.tw
- 208. Andhra Pradesh.tw
- 209. Arunachal Pradesh.tw
- 210. Assam.tw
- 211. Bihar.tw
- 212. Dadra and Nagar Haveli.tw
- 213. Chhattisgarh.tw

- 214. Daman and Diu.tw
- 215. National Capital Territory of New Delhi.tw
- 216. Delhi.tw
- 217. Goa.tw
- 218. Gujarat.tw
- 219. Haryana.tw
- 220. Himachal Pradesh.tw
- 221. Jammu and Kashmir.tw
- 222. Janmu.tw
- 223. Kashmir.tw
- 224. Jharkhand.tw
- 225. Karnataka.tw
- 226. Mysore.tw
- 227. Kerala.tw
- 228. Travancore-Cochin.tw
- 229. Madhya Pradesh.tw
- 230. Madhya Bharat.tw
- 231. Maharashtra.tw
- 232. Manipur.tw
- 233. Meghalaya.tw
- 234. Mizoram.tw
- 235. Nagaland.tw
- 236. Odisha.tw
- 237. Orissa.tw
- 238. Punjab.tw
- 239. Chandigarh.tw
- 240. Rajasthan.tw
- 241. Sikkim.tw
- 242. Tamil Nadu.tw
- 243. Madras State.tw
- 244. Telangana.tw
- 245. Tripura.tw
- 246. Uttarakhand.tw
- 247. Uttaranchal.tw
- 248. Uttar Pradesh.tw

- 249. United Provinces.tw
- 250. West Bengal.tw
- 251. Lakshadweep.tw
- 252. P#d#cherry.tw
- 253. OR (207-252)**
- 254. 206 OR 253**
- 255. 203 AND 254**

For 'Medline' and 'Embase' databases, 'Text Word' and 'MeSH Subject Heading' were used in the indexing field.

For 'Psyc-info' and 'Global health' databases, 'Abstract' and 'Subject heading' were used correspondingly.
